# Supplementary material for: Lifestyle as Risk Factor for Infectious Causes of Death in Young Dogs: A Retrospective Study in Southern Italy (2015–2017)
Source: Vet Med Int. 2020 Jun 5;2020:6207297. doi: 10.1155/2020/6207297 (PMC7293748; doi:10.1155/2020/6207297)
Supplement: Supplementary Materials — The supplementary material contains raw data on age, breed, gender, and lifestyle of the dogs and the results of microbiological and necropsy examination. [file 6207297.f1.xlsx]

## Sheet: Sheet2
Num	ID	YEAR	LIFESTYLE	GENDER	BREED	AGE	VIRUSES							BACTERIA			LESIONS
1	3221	2015	OWNERLESS	M	MIX	< 6 m	CPV-2a	CCoV-I						Salmonella spp			Enteritis
2	8608	2015	OWNED	F	MALTESE	< 6 m	CPV-2 Vacc	CPV-2a	CPV-2c	CDV							Enteritis	Pneumonia
3	10364	2015	OWNED	U	UNKNOWN	< 6 m	CPV-2a							Pseudomonas spp	Enterobacter
4	14018	2015	OWNERLESS	M	PINSCHER	> 6 m	CPV-2a										Enteritis
5	15530	2015	OWNERLESS	F	MIX	< 6 m	CPV-2a										Enteritis
6	15910/1	2015	OWNERLESS	F	SPITZ	< 6 m	CPV-2 Vacc	CPV-2b									Enteritis	Pneumonia
7	15910/2	2015	OWNERLESS	F	YORKSHIRE TERRIER	< 6 m	CPV-2 Vacc	CPV-2b	CDV								Enteritis	Pneumonia
8	15910/3	2015	OWNERLESS	M	CAVALIER KING CHARLS SPANIEL	< 6 m	CPV-2 Vacc	CPV-2a	CCoV-IIa	CDV				E. faecium			Enteritis	Pneumonia	Encephalitis	Myocarditis
9	15910/4	2015	OWNERLESS	M	LABRADOR	< 6 m	CPV-2 Vacc	CPV-2b	CCoV-I	CDV				E. coli				Pneumonia
10	15952/1	2015	OWNERLESS	F	AKITA INU	> 6 m	CPV-2 Vacc	CDV						CPA	E. faecium		Enteritis	Pneumonia	Encephalitis		Hepatitis
11	15952/2	2015	OWNERLESS	M	SHIBA INU	> 6 m	CPV-2a	CDV						CPA			Enteritis	Pneumonia	Encephalitis		Hepatitis
12	15952/3	2015	OWNERLESS	F	POODLE	> 6 m	CPV-2a	CDV						B. bronchiseptica			Enteritis	Pneumonia	Encephalitis		Hepatitis
13	15952/4	2015	OWNERLESS	F	CHOW CHOW	> 6 m	CPV-2 Vacc	CPV-2a	CDV					CPA	Klebsiella spp		Enteritis	Pneumonia	Encephalitis
14	15952/5	2015	OWNERLESS	F	PINSCHER	> 6 m	CPV-2a	CDV									Enteritis	Pneumonia	Encephalitis		Hepatitis
15	15952/6	2015	OWNERLESS	F	HUSKY	> 6 m	CPV-2a	CDV									Enteritis	Pneumonia	Encephalitis		Hepatitis
16	18697	2015	OWNERLESS	F	MIX	> 6 m	CPV-2a										Enteritis		Encephalitis
17	24100	2015	OWNED	M	MIX	> 6 m	CDV											Pneumonia	Encephalitis
18	30300	2015	OWNED	U	UNKNOWN	> 6 m	CPV-2 Vacc	CPV-2b									Enteritis	Pneumonia
19	32279	2015	OWNED	M	MIX	< 6 m	CPV-2 Vacc	CPV-2b									Enteritis
20	37285	2015	OWNED	M	UNKNOWN	< 6 m	CPV-2b										Enteritis	Pneumonia	Encephalitis		Hepatitis
21	37412	2015	OWNED	F	CHOW CHOW	< 6 m	CPV-2 Vacc	CPV-2b
22	42293	2015	OWNED	M	BEAGLE	< 6 m	CPV-2a							S. marcescens			Enteritis	Pneumonia		Myocarditis	Hepatitis
23	44465	2015	OWNED	F	POINTER	< 6 m	CPV-2a	CPV-2b						E. coli			Enteritis	Pneumonia
24	49364	2015	OWNED	M	DACHSHUND	< 6 m								E. faecium			Enteritis	Pneumonia
25	51327	2015	OWNED	M	JACK RUSSEL	< 6 m	CPV-2a	CCoV-I	CHV-1	CDV							Enteritis				Hepatitis
26	63617	2015	OWNED	M	ENGLISH BULLDOG	< 6 m	CPV-2a							Salmonella spp				Pneumonia			Hepatitis
27	66428	2015	OWNED	U	UNKNOWN	< 6 m	CPV-2b							CPA	E. coli		Enteritis	Pneumonia
28	66939	2015	OWNED	M	NAPOLITAN MASTIFF	> 6 m	CPV-2b							E. coli			Enteritis
29	67279	2015	OWNED	F	POODLE	< 6 m	CPV-2b	CAV-2						Citrobacter	E. faecium		Enteritis	Pneumonia
30	86833	2015	OWNERLESS	F	MIX	< 6 m	CPV-2b										Enteritis	Pneumonia
31	87571	2015	OWNERLESS	M	MIX	> 6 m	CPV-2b							E. coli			Enteritis	Pneumonia
32	91849	2015	OWNERLESS	M	MIX	< 6 m	CPV-2b										Enteritis				Hepatitis
33	99999	2015	OWNED	F	YST	< 6 m	CPV-2 Vacc										Enteritis	Pneumonia	Encephalitis	Myocarditis	Hepatitis
34	110025	2015	OWNED	F	YST	< 6 m								E. coli			Enteritis	Pneumonia	Encephalitis		Hepatitis
35	110610/1	2015	OWNED	M	POINTER	< 6 m								E. coli			Enteritis
36	110610/2	2015	OWNED	M	POINTER	< 6 m								E. coli			Enteritis
37	127041	2015	OWNED	F	MIX	> 6 m	CPV-2a											Pneumonia			Hepatitis
38	141858	2015	OWNED	M	NAPOLITAN MASTIFF	< 6 m	RV										Enteritis	Pneumonia	Encephalitis		Hepatitis
39	151455	2015	OWNED	F	CHIHUAHUA	> 6 m	CPV-2b										Enteritis
40	156933	2015	OWNERLESS	F	MIX	> 6 m	CPV-2a	CPV-2c	CDV	CAV-1							Enteritis	Pneumonia
41	157726	2015	OWNED	M	ROTTWEILLER	< 6 m	CPV-2b	CAV-1						Klebsiella spp			Enteritis	Pneumonia	Encephalitis		Hepatitis
42	158161	2015	OWNED	F	CHOW CHOW	< 6 m	CPV-2a	CPV-2b										Pneumonia	Encephalitis
43	158808	2015	OWNED	F	CHOW CHOW	< 6 m	CPV-2b											Pneumonia	Encephalitis
44	20533	2016	OWNED	M	CHIHUAHUA	< 6 m	CPV-2b							Pseudomonas spp	E. coli		Enteritis	Pneumonia		Myocarditis
45	24079	2016	OWNED	M	ENGLISH BULLDOG	> 6 m								Klebsiella spp	Enterobacter	CPA	Enteritis	Pneumonia
46	24778	2016	OWNERLESS	M	MIX	> 6 m	CPV-2b	CAV-1						CPA			Enteritis	Pneumonia
47	27940/1	2016	OWNED	U	UNKNOWN	< 6 m	CPV-2a										Enteritis	Pneumonia
48	27940/2	2016	OWNED	U	UNKNOWN	< 6 m	CPV-2a										Enteritis	Pneumonia
49	27940/3	2016	OWNED	U	UNKNOWN	< 6 m	CPV-2a										Enteritis	Pneumonia
50	42603/1	2016	OWNED	M	MIX	< 6 m	CPV-2a										Enteritis	Pneumonia	Encephalitis		Hepatitis
51	42603/2	2016	OWNED	F	MIX	< 6 m	CAV-1							CPA					Encephalitis		Hepatitis
52	43891/1	2016	OWNERLESS	M	MIX	< 6 m	CCoV-IIa										Enteritis	Pneumonia	Encephalitis
53	43891/2	2016	OWNERLESS	F	MIX	< 6 m	CCoV-IIa							CPA			Enteritis	Pneumonia	Encephalitis
54	62021	2016	OWNED	M	ENGLISH SETTER	< 6 m	CPV-2 Vacc	CPV-2b									Enteritis	Pneumonia
55	67817	2016	OWNED	F	MIX	< 6 m	CPV-2b										Enteritis
56	72731	2016	OWNED	F	ARGENTINE MASTIFF	< 6 m	CPV-2b										Enteritis
57	72734/1	2016	OWNED	F	LABRADOR	< 6 m	CPV-2b							Pasteurella canis	E. coli	CPA
58	72734/2	2016	OWNED	M	LABRADOR	< 6 m	CPV-2b	CDV						E. coli	CPA
59	72758	2016	OWNED	U	UNKNOWN	> 6 m	CPV-2b							E. coli	CPA		Enteritis				Hepatitis
60	76123	2016	OWNERLESS	M	MIX	< 6 m	CPV-2b										Enteritis	Pneumonia
61	78266	2016	OWNED	F	GERMAN SHEPHERD	> 6 m	CPV-2b							Kocuria rosea	E. coli
62	78870	2016	OWNED	M	CHIHUAHUA	< 6 m	CPV-2 Vacc	CPV-2b	CPV-2c	CCoV-IIa	CCoV-IIb	CDV	CAV-2				Enteritis	Pneumonia	Encephalitis
63	81578	2016	OWNERLESS	M	MIX	> 6 m	CPV-2a	CDV						Enterobacter cloacae			Enteritis	Pneumonia	Encephalitis		Hepatitis
64	83191/1	2016	OWNED	F	NAPOLITAN MASTIFF	< 6 m	CPV-2a	CDV	CAV-2					Str. uberi	Str. dysgalactiae	Str. mitis/oralis	Enteritis		Encephalitis	Myocarditis	Hepatitis
65	83191/2	2016	OWNED	M	NAPOLITAN MASTIFF	< 6 m	CPV-2a							E. coli	CPA		Enteritis		Encephalitis	Myocarditis	Hepatitis
66	92826	2016	OWNERLESS	M	MIX	> 6 m	CPV-2b	CCoV-I	CCoV-IIa								Enteritis	Pneumonia
67	96461	2016	OWNED	M	MIX	< 6 m	CPV-2a	CAV-2						CPA			Enteritis	Pneumonia
68	96539	2016	OWNED	F	GERMAN SHEPHERD	> 6 m	CPV-2a							Enterococcus faecium	CPA		Enteritis
69	98960/1	2016	OWNERLESS	F	ENGLISH BULLDOG	< 6 m	CPV-2a	CCoV-IIa	CAV-2					Klebsiella spp			Enteritis	Pneumonia			Hepatitis
70	98960/2	2016	OWNERLESS	F	PUG	< 6 m	CPV-2a	CAV-2						Enterococcus faecalis	E. coli		Enteritis	Pneumonia			Hepatitis
71	98960/3	2016	OWNERLESS	M	ENGLISH BULLDOG	< 6 m	CPV-2a	CAV-2						E. coli			Enteritis	Pneumonia			Hepatitis
72	98960/4	2016	OWNERLESS	M	DOGUE DE BORDEAUX	< 6 m	CPV-2a	CCoV-IIa	CAV-2					Enterococcus faecium	E. coli		Enteritis	Pneumonia			Hepatitis
73	100088	2016	OWNERLESS	F	MIX	> 6 m	CPV-2b	CDV	CAV-2					CPA			Enteritis	Pneumonia	Encephalitis	Myocarditis
74	100347	2016	OWNED	M	MIX	< 6 m	CPV-2b	RV									Enteritis	Pneumonia
75	101623	2016	OWNED	F	CHIHUAHUA	< 6 m	CPV-2b	CAV-2									Enteritis	Pneumonia			Hepatitis
76	143145/1	2016	OWNED	M	MIX	< 6 m											Enteritis	Pneumonia	Encephalitis
77	143145/2	2016	OWNED	M	MIX	< 6 m											Enteritis	Pneumonia	Encephalitis
78	147437	2016	OWNED	M	MIX	< 6 m								Str. Sanguinis	Pasteurella		Enteritis	Pneumonia
79	166667	2016	OWNED	F	CHIHUAHUA	< 6 m								Enterococcus faecium			Enteritis	Pneumonia			Hepatitis
80	168505	2016	OWNERLESS	M	MIX	< 6 m	CPV-2b										Enteritis	Pneumonia	Encephalitis
81	5006/2	2017	OWNED	M	ITALIAN MSTIFF	< 6 m								E. coli CNF			Enteritis	Pneumonia			Hepatitis
82	5006/3	2017	OWNED	M	ITALIAN MSTIFF	< 6 m								E. coli CNF			Enteritis	Pneumonia
83	17939	2017	OWNED	M	MAREMMA SHEPHERD	< 6 m	CPV-2b							E. coli			Enteritis	Pneumonia	Encephalitis
84	18929/1	2017	OWNED	M	FOX TERRIER	< 6 m												Pneumonia	Encephalitis
85	18929/2	2017	OWNED	M	FOX TERRIER	< 6 m								Leclercia adecarboxylata				Pneumonia	Encephalitis
86	18929/3	2017	OWNED	M	FOX TERRIER	< 6 m												Pneumonia	Encephalitis
87	26522	2017	OWNERLESS	F	MIX	< 6 m	CPV-2b										Enteritis	Pneumonia			Hepatitis
88	26723	2017	OWNERLESS	F	PITBULL	> 6 m	CPV-2a							E. coli			Enteritis	Pneumonia			Hepatitis
89	34857	2017	OWNERLESS	M	HUSKY	< 6 m	CPV-2a	CCoV-I										Pneumonia
90	34865	2017	OWNERLESS	M	HUSKY	< 6 m	CCoV-IIa										Enteritis	Pneumonia			Hepatitis
91	34866	2017	OWNERLESS	M	SPITZ	< 6 m	CCoV-I	CDV									Enteritis	Pneumonia			Hepatitis
92	34869	2017	OWNERLESS	M	SPITZ	< 6 m								Bordetella bronchiseptica			Enteritis	Pneumonia			Hepatitis
93	34870	2017	OWNERLESS	F	SPITZ	< 6 m								E. coli CNF e CDT			Enteritis	Pneumonia			Hepatitis
94	34873	2017	OWNERLESS	F	SPITZ	< 6 m	CCoV-IIa										Enteritis	Pneumonia			Hepatitis
95	34875	2017	OWNERLESS	F	SPITZ	< 6 m	CPV-2a	CCoV-IIa									Enteritis	Pneumonia
96	34876	2017	OWNERLESS	F	SPITZ	< 6 m	CCoV-IIa										Enteritis	Pneumonia			Hepatitis
97	34879	2017	OWNERLESS	F	SHIBA INU	< 6 m	CCoV-IIa							B. bronchiseptica	Cl. perfringens	E. coli	Enteritis	Pneumonia			Hepatitis
98	34881	2017	OWNERLESS	M	ENGLISH BULLDOG	< 6 m	CPV-2a	CCoV-IIa						Str. agalactiae			Enteritis	Pneumonia
99	35674	2017	OWNED	M	MIX	< 6 m	CPV-2b										Enteritis				Hepatitis
100	42211	2017	OWNED	M	MIX	> 6 m	CPV-2a	CCoV-IIa									Enteritis				Hepatitis
101	43020	2017	OWNED	F	MIX	> 6 m	CPV-2a	CCoV-IIa									Enteritis				Hepatitis
102	43021	2017	OWNED	F	MIX	> 6 m	CPV-2a	CCoV-IIa						Cl. perfringens			Enteritis				Hepatitis
103	43022	2017	OWNERLESS	M	MIX	> 6 m	CPV-2b	CCoV-IIa	CHV-1								Enteritis	Pneumonia
104	44701	2017	OWNED	M	GERMAN SHEPHERD	< 6 m	CPV-2a							Str. Coagulasi +	E. Coli		Enteritis	Pneumonia			Hepatitis
105	60154	2017	OWNED	M	MIX	< 6 m	CPV-2b										Enteritis	Pneumonia			Hepatitis
106	81483	2017	OWNED	F	MIX	< 6 m
107	83409/1	2017	OWNED	M	MIX	> 6 m	CPV-2b							E. coli CNF			Enteritis	Pneumonia			Hepatitis
108	83409/2	2017	OWNED	M	MIX	< 6 m	CPV-2b							Staph. Lentus	Enterococcus durans	E. coli CNF	Enteritis	Pneumonia
109	84844	2017	OWNED	M	GREAT DANE	< 6 m								E. coli				Pneumonia
110	91490	2017	OWNERLESS	M	SPITZ	< 6 m	CPv-2a	CCoV-IIa									Enteritis		Encephalitis		Hepatitis
111	91494	2017	OWNERLESS	F	SPITZ	< 6 m	CPV-2a	CCoV-IIa	CAV-2								Enteritis		Encephalitis
112	91501	2017	OWNERLESS	M	ENGLISH BULLDOG	< 6 m	CPV-2a	CCoV-IIa	CAV-2								Enteritis				Hepatitis
113	91504	2017	OWNERLESS	M	SPITZ	< 6 m	CPV-2a	CCoV-IIa	CAV-2								Enteritis				Hepatitis
114	91507	2017	OWNERLESS	F	SPITZ	< 6 m	CPV-2 Vacc	CCoV-I	CCoV-IIa	CAV-2							Enteritis	Pneumonia			Hepatitis
115	91510	2017	OWNERLESS	M	MALTESE	< 6 m	CPV-2a	CCoV-IIa	CAV-2								Enteritis		Encephalitis		Hepatitis
116	91513	2017	OWNERLESS	F	YORKSHIRE TERRIER	< 6 m	CPV-2 Vacc	CCoV-IIa	CAV-2					Klebsiella			Enteritis		Encephalitis
117	91517	2017	OWNERLESS	M	MALTESE	< 6 m	CPV-2a	CCoV-IIa	CAV-2	CAV-1				Str. Canis				Pneumonia	Encephalitis		Hepatitis
118	91519	2017	OWNERLESS	M	MALTESE	< 6 m	CPV-2a	CCoV-IIa	CAV-2					Enterocuccus durans				Pneumonia			Hepatitis
119	91529	2017	OWNERLESS	F	POODLE	< 6 m	CPV-2a	CCoV-IIa	CAV-2									Pneumonia	Encephalitis		Hepatitis
120	91531	2017	OWNERLESS	F	YORKSHIRE TERRIER	< 6 m	CPV-2a	CCoV-IIa	CAV-2					Enterococcus faecalis	E. coli EAE ed ST		Enteritis	Pneumonia	Encephalitis		Hepatitis
121	91532	2017	OWNERLESS	M	MALTESE	< 6 m	CPV-2a	CCoV-IIa	CAV-2								Enteritis	Pneumonia	Encephalitis		Hepatitis
122	91536	2017	OWNERLESS	F	SPITZ	< 6 m	CPV-2a	CCoV-IIa	CAV-2					Acinetobacter baumanii				Pneumonia			Hepatitis
123	91538	2017	OWNERLESS	M	MALTESE	< 6 m	CPV-2a	CCoV-IIa	CAV-2					E. coli EAE				Pneumonia			Hepatitis
124	91542	2017	OWNERLESS	M	MALTESE	< 6 m	CPV-2a	CCoV-IIa	CAV-2								Enteritis	Pneumonia
125	94583	2017	OWNERLESS	M	MALTESE	< 6 m	CPV-2a	CCoV-IIb	CAV-2					Cl. perfringens, Klebsiella	Str. dysgalactiae equisimilis	CPA	Enteritis	Pneumonia			Hepatitis
126	104888	2017	OWNED	M	ITALIAN MSTIFF	< 6 m								Klebsiella			Enteritis	Pneumonia			Hepatitis
127	134392	2017	OWNERLESS	M	MIX	< 6 m	CPV-2b							Str. canis			Enteritis	Pneumonia
128	135038	2017	OWNERLESS	M	MALTESE	< 6 m	CPV-2a	CAV-2									Enteritis			Myocarditis
129	135039	2017	OWNERLESS	M	MALTESE	< 6 m	CPV-2a	CCoV-IIb	CAV-2					Enterococcus faecium	CPA		Enteritis	Pneumonia			Hepatitis
130	135041	2017	OWNERLESS	M	MALTESE	< 6 m	CPV-2b	CAV-2						CPA			Enteritis	Pneumonia
131	135065	2017	OWNED	M	CHIHUAHUA	< 6 m	CPV-2a	CPV-2c									Enteritis
132	149914	2017	OWNERLESS	F	CHOW CHOW	< 6 m	CPV-2 Vacc							Cl. perfringens			Enteritis
133	149917	2017	OWNERLESS	M	CHOW CHOW	< 6 m	CPV-2b	CPV-2c	CCoV-I	CHV-1				Str. dysgalactiae subs equisimilis			Enteritis	Pneumonia	Encephalitis		Hepatitis
134	149922	2017	OWNERLESS	M	CHOW CHOW	< 6 m	CPV-2b	CPV-2c	CCoV-I	CHV-1				E. coli	B. bronchiseptica		Enteritis	Pneumonia	Encephalitis		Hepatitis
135	149924	2017	OWNERLESS	F	LABRADOR	< 6 m	CPV-2b	CPV-2c	CCoV-I	CHV-1				CPA	E. coli		Enteritis	Pneumonia	Encephalitis		Hepatitis
136	149926	2017	OWNERLESS	M	LABRADOR	< 6 m	CPV-2b	CPV-2c	CCoV-I	CCoV-IIa				Cl. perfringens			Enteritis	Pneumonia	Encephalitis		Hepatitis
137	149934	2017	OWNERLESS	M	CHOW CHOW	< 6 m	CPV-2b	CPV-2c						E. coli			Enteritis	Pneumonia	Encephalitis		Hepatitis
138	149935	2017	OWNERLESS	F	CKCS	< 6 m	CPV-2b	CPV-2c						Cl. perfringens			Enteritis	Pneumonia	Encephalitis		Hepatitis
